# Supplementary material for: Assessing reproductive biology of Macrobrachium lamarrei in the Ganges River (NW Bangladesh) in relation to environmental parameters
Source: PubMed Central journal article supplement — Saudi J Biol Sci. 2021 Jul 1;28(11):6305–16. doi: 10.1016/j.sjbs.2021.06.077 (PMC8568718; doi:10.1016/j.sjbs.2021.06.077), 2021-07-01
Supplement: mmc1.pdf [file mmc1.pdf]

# M. lamerii

*by Hossain Et Al*

---

**Submission date:** 29-Apr-2021 01:57AM (UTC-0700)

**Submission ID:** 1573218762

**File name:** Manuscript\_29.04.21.docx (54.74K)

**Word count:** 5565

**Character count:** 31463

36

**Reproductive Biology of *Macrobrachium lamarrei* in the Ganges River (NW Bangladesh) in relation to Climato-hydrological parameters**

**Md. Yeamin Hossain\*, Zannatul Mawa, Md. Rabiul Hasan, Md. Ashekur Rahman, Sumaya Tanjin, Mst. Monira Khatun and Saleha Jasmine**

Department of Fisheries, University of Rajshahi, Rajshahi-6205, Bangladesh

\*Corresponding authors' e-mail: [hossainyeamin@gmail.com](mailto:hossainyeamin@gmail.com)

ORCID: 0000-0002-8183-7296

**Running title:** <sup>6</sup>Reproductive Biology of *Macrobrachium lamarrei*

## ABSTRACT

*Macrobrachium lamarrei* (H. Milne-Edwards 1837) is a native freshwater prawn species of Bangladesh. The aim of the research was to explore various reproductive aspects (size at sexual maturity, reproductive period and fecundity) of *M. lamarrei* in the Ganges River, Bangladesh through October 2012 to September 2013. We also study the environmental parameters and their impact on reproduction of *M. lamarrei*. A total 391 (ovigerous=141, non-ovigerous=250) female specimens were collected using fishing traps and Drag net. The  $TL_{50}$  (the TL at which 50% of individuals become mature) was calculated by a logistic equation as 5.20 cm. Based on the availability of ovigerous females the spawning season was February-November with the peak June-July. Further, 50% and 90% ovigerous females were observed when Fulton's condition factor ( $K_F$ ) was 0.85 and 1.03, respectively. The total fecundity ( $F_T$ ) was ranged from 65-370 where TL was 4.20-6.40 cm and BW was 0.84-2.50 g. Fecundity was found to be highly correlated with TL ( $r^2 \geq 0.96$ ,  $r_s=0.96$ ,  $p<0.0001$ ) and BW ( $r^2 \geq 0.88$ ,  $r_s=0.93$ ,  $p<0.0001$ ). Temperature ( $r_p=0.82$ ,  $p=0.009$ ), dissolved oxygen (DO) ( $r_p=-0.83$ ,  $p=0.0007$ ), pH ( $r_p=0.80$ ,  $p=0.0014$ ) and total alkalinity ( $r_p=-0.87$ ,  $p=0.0002$ ), were highly correlated with ovigerous females. The average temperature on peak spawning season was 32°C. Also, the spawning period connected with the peak rainfall and showed a notable relation between rainfall and ovigerous females. In addition, exploration of long data series pointed that yearly average air temperature is rising by 0.029 °C yr<sup>-1</sup>, whereas yearly average rainfall is falling by 2.96 mm yr<sup>-1</sup>. Therefore, the result will be helpful for the sustainable management and conservation of *M. lamarrei* through fixed permissible mesh size and establishment of a ban period in the Ganges River, Bangladesh and adjoining ecosystems.

**Keywords:** *Macrobrachium lamarrei*, Size at sexual maturity, Spawning season, Climate change, Environmental parameters

## 1. Introduction

*Macrobrachium* is one of the most mosaic freshwater genera under the family Palaemonidae. Among the crustacean fishery Palaemonidae family is considered as a highly significant commercial resource worldwide (Mantelatto and Barbosa, 2005; De Grave and Franssen, 2011; Hossain et al., 2012a; Ara et al., 2014). *Macrobrachium lamarrei* is a member of this family that has a lucrative significance due to its rapid growth, succinct life span and is an extremely important part of the catch nature in Bangladesh (Sharma and Subba, 2005). Amongst several freshwater prawns existing in Bangladesh, *M. lamarrei* is renowned one, usually called as “Kuncho river prawn” which is an important source of foreign exchange (Ara et al., 2014). It is also known as Kuncho chingri in India (Sharma and Subba, 2005). This kuncho river prawn is distributed in Bangladesh, India, Pakistan, and Nepal (Sharma and Subba, 2005; Ara et al., 2014). It is usually found in beels, rivers and ponds (Kibria, 1983; Ara et al., 2014). This prawn is omnivorous and feeds on all kinds of sustenance, living or dead such as micro-plankton, algae, fish fleshes, decomposing plants and animals (Sharma and Subba, 2005). *M. lamarrei* is considered a least concerned species in both Bangladesh (IUCN Bangladesh, 2015) and worldwide (IUCN, 2020). Kuncho chingri comprises huge economic importance as its has better taste, high price, and growing demand in the global market (Hussain and Manohar, 2016). Prawns are a key source of protein after fish and play a significant role in the aquatic ecosystems by reprocessing dead organic substance (Raghunathan and Valarmathi, 2005). But the production of the prawn is deteriorating owing to use of pesticides in crop fields and habitat damage. So, it is important to increase the production potentiality of this species. Therefore, an exhaustive study of reproductive biology of this prawn is needed (Sarkar et al., 2012).

Mainly fisheries management depends on precise assessment of biological parameters (Tracey et al., 2007). Appropriate management systems for protection of the aquatic organisms are mostly relying on the information of reproductive criterion (Hardie et al., 2007). Reproductive criterions are an essential apparatus to have idea about systems of biological conservation of an aquatic organism (Hussain and Manohar, 2016).

In the mating process of *Macrobrachium* sp., the male deposits sperm on the underside of the female thorax between the walking legs. The female extrudes the eggs that pass through the sperm. The female brings the fertilized eggs with her before they are hatched; the period may

vary but is usually less than three weeks (Wynne, 2000).<sup>11</sup> In the natural environment, *Macrobrachium* sp. may spawn 3 to 4 times per year (Ling, 1969) or more than 4 times (Rao, 1991).

The size of maturity in fish may vary across population from environmental condition and can help to determine the smallest catchable size of fishes (Templeman, 1987; Lucifora et al., 1999). Estimation of spawning/breeding season in fish is essential mainly for the conservation of mature individuals from heavy fishing pressure or other reasons (Templeman, 1987).

<sup>16</sup> Fecundity is defined as the number of oocytes released from female pleopods in a single spawning season (Ramirez-Llodra, 2002).<sup>16</sup> To well-understanding of the population dynamics, the information of fecundity is needed (Lagler, 1956). It is very essential for assessment of reproductive potential and providing information about the number of recruits produced in a period and the reproductive capability of the species (Hussain and Manohar, 2016; Sabbir et al., 2021).<sup>14</sup> In the management strategies of prawn hatcheries, it is used to evaluate the reproductive capacity of brood prawns (Sharma and Subba, 2005).

Worldwide climate alteration responsible for changing aquatic ecosystem facilities those are essential for human welfare (Lorenzo and Galassi, 2017).<sup>17</sup> Climate change puts extra stress on freshwater ecosystems that have previously been seriously stressed by human activities (Doll et al., 2009). The dispersal limits of the maximum benthic organisms are distinguished by various environmental factors stand-in their whole life cycles (Bertini et al., 2010).<sup>2</sup> Environmental issues (temperature and rainfall) and hydrological parameters (e.g. Do, pH, and alkalinity) have continuous effects on growth and reproduction of aquatic organisms ((Lappalainen et al., 2008; Shoji et al., 2011; Britton et al., 2013). In addition, the growth rate of aquatic organisms is reduced with the decrease of water temperature (Blanck and Lamouroux, 2007; Lappalainen et al., 2008; Carmona-Catot et al., 2011).<sup>19</sup> The temperature is considered as the key to control every phase of reproduction (Pankhurst and Porter, 2003).<sup>2</sup> Besides, temperature is the basic abiotic factor regulating the movements of larvae of fish and crustacean (Jakobsen et al., 2009).<sup>26</sup>

Knowledge about the reproductive feature of *M. lamarrei* is scarce in the scientific papers. There are some works that have been done on various aspects for *Macrobrachium* species in water bodies worldwide (Table 1). Hence, it is the first study in which investigates the effect of environmental variation and hydrological parameters on the reproduction of *M. lamarrei* in

Ganges River or anywhere else in the world. Consequently, the goal of this study is to investigate different reproductive features of *M. lamarrei* and the impact of environmental variation on their reproductive activities in the Ganges River, (NW) Bangladesh.

## 2. Materials and Method

### 2.1. Sampling

Our research was conducted in the Ganges River (Latitude 24° 22' N; Longitude 88° 35' E), NW Bangladesh (Fig.1). Monthly samples of *M. lamarrei* were collected from the fisher's catch landed at different points of the Ganges River (Godadari, Jahajghat, Charghat), Rajshahi, NW Bangladesh during the sampling period (October 2012 to September 2013). The prawns were caught by using traditional fishing gears including Traps and Drag net along with other fishes from different fishing points between mentioned areas.

### 2.2. Prawn measurement

A total 391 (ovigerous=141, non-ovigerous=250) specimens were collected from the study site and then fix in 10% formalin. The fixed specimens were then taken out one by one later to be weighed, measured and sexes were identified by the presence and absence of appendix masculina on 2<sup>nd</sup> pleopod (Tiwari, 1955; Cai and Naiyaneter, 2004). Individual total length (TL) was noted up to 0.01 cm using a digital slide caliper and weight was measured (BW, nearest 0.01g) using an electric balance.

### 2.3. Size at first sexual maturity

Ovigerous females were pointed out by the bearing of embryos (external oocytes) attached on its pleopods.  $TL_{50}$  denoted the length wherein 50% of the individual specimens were matured. In order to analysis of  $TL_{50}$ , a logistic curve was applied by plotting the percentage of ovigerous female (POF) against TL class as  $POF = 100/[1 + \exp\{-f(TL_m - TL_{50})\}]$  (King 2007). Also, the size at first sexual maturity ( $L_m$ ) of *M. lamarrei* was estimated by the relationship between percent occurrences of ovigerous female against its 1.00 cm TL class (Hossain and Ohtomi 2008).

#### 2.4. Spawning season and condition

The percentage occurrence of monthly ovigerous females was observed for estimation of spawning and peak spawning season of *M. lamarrei*. And  $K_F$  was used to assess the relationship between POF and  $K_F$  by logistic model (King 2007). And  $K_F$  was calculated by:  $K_F = 100 \times (W/L^3)$  (Fulton 1904).

#### 2.5. Fecundity

Firstly, forceps was used to eradicate the ovum mass from the female's brood sack and then count the number of oocytes. The fecundity was estimated by actual counting method of (Lagler et al. 1967). Relationship between (i) TL vs.  $F_T$  and (ii) BW vs  $F_T$ . were estimated by the formula: (i)  $\ln F_T = m+n \ln TL$ ;  $F_T = m \times TL^n$  and (ii)  $\ln F_T = m+n \ln BW$ ;  $F_T = m \times BW^n$ . Where,  $F_T$  means total fecundity, m and n is constant parameters in the linear regression analysis. The coefficient of determination ( $r^2$ ) of each of the relationships was also estimated.

#### 2.6. Climato-hydrological parameters

Hydrological data were collected in every month from sampling station by HACH (HQ40a) digital multi-meter parameter to assess dissolved oxygen (mg/l), temperature ( $^{\circ}\text{C}$ ), pH, total dissolved solids (TDS) mg/l and total alkalinity (mg/l). Climatological data (rainfall and air temperature) were obtained from the meteorological station of Dhaka, Bangladesh.

#### 2.7. Statistical analyses

Statistical analyses were prepared by Past 4.03, Excel program and Graphpad Prism 6.5 with 5 % significant level. Normality of the data was confirmed by Shapiro-Wilk normality test, and violin-box plot. Besides, Spearman rank test was performed to assess the relationship between POF and  $K_F$ . Pearson correlation and Spearman rank test used to evaluate the impact of the environmental and hydrological factors on POF for detecting the vital influence of environment on ovigerous female and spawning.

### 3. Results

A total 391 (ovigerous=141, non-ovigerous=250) female specimens of *M. lamarrei* were analyzed, total length was ranged from 2.80- 6.40 cm, body weight was 0.22–2.50 g and egg weight was 0.05–0.30 g (Table 2). Data (TL, BW) did not pass the normality ( $p < 0.0001$ , Fig. 2).

#### 3.1. Size at first sexual maturity

According to the logistic model, the size at sexual maturity of *M. lamarrei* ( $L_m$ ) was 5.20 cm (Fig. 3).

#### 3.2. Spawning season and condition

Monthly changes in POF were recorded (Fig. 4). Ovigerous females were found from February–November with the highest percentage in June–July. No ovigerous female was observed during December 2012 to January 2013. So, the spawning season of *M. lamarrei* was February–November and the peak was in June–July. According to the logistic model 50% ovigerous females were found when  $K_F$  was 0.85 and 90% ovigerous females were found when  $K_F$  was 1.03 (Fig. 5). In addition, spawning season of *Macrobrachium sp.* from world-wide water bodies and fishes in Ganges River was given in Table 3.

#### 3.3. Fecundity indices

For calculate fecundity ( $F_T$ ), a total of 52 females (4.20–6.40 cm TL) were used.  $F_T$  ranged from 65–370 (mean  $\pm$  SD,  $154 \pm 59$ ). Significant correlation observed between total fecundity vs. total length ( $r^2 \geq 0.96$ ,  $r_s = 0.96$ ,  $p < 0.0001$ ) and total fecundity vs. body weight ( $r^2 \geq 0.88$ ,  $r_s = 0.93$ ,  $p < 0.0001$ ). The relative fecundity ranged from 76–163 (mean  $128 \pm 19$ ). Also, significant linear relationships were found for natural log (ln) transfer of  $F_T$  - TL,  $F_T$  - BW. Above relationships were shown in (Fig. 6).

#### 3.4. Climato-hydrological parameters

In this study, According to Pearson correlation test, Temperature ( $r_p = 0.828$ ,  $p = 0.009$ ), dissolved oxygen (DO) ( $r_p = -0.83$ ,  $p = 0.0007$ ), pH ( $r_p = 0.80$ ,  $p = 0.0014$ ) and total alkalinity ( $r_p = -0.87$ ,  $p = 0.0002$ ), were highly correlated with ovigerous females except TDS ( $r_p = -0.43$ ,  $p = 0.1606$ ) (Table 4, Fig. 7). In April–July, we observed the highest water temperature (average



32 °C) when an ovigerous female was in elevation. The lowest temperature was in January and this time no ovigerous females were absent.

<sup>1</sup> A long data series (1964 to 2014) of air temperature and of rainfall were arranged to observe its fluctuation over time. The yearly average air temperature was rising up to 0.029 °C yr<sup>-1</sup> ( $r^2=0.350$ ) while rainfall indicated dropping trend by 2.96 mm yr<sup>-1</sup> ( $r^2=0.018$ ) (Fig. 8). However, air temperature ( $r_s=0.8248$ ,  $p=0.0015$ ) and rainfall ( $r_s=0.6925$ ,  $p=0.0152$ ) was recorded significantly related with POF (Fig. 9).

#### 4. Discussion

Information on reproductive features <sup>2</sup> is vital to assess the life cycle and stocks of fish as well as aquatic organisms (Hossain et al., 2017). Our research presents the most comprehensive investigation on reproductive biology of *M. lamarrei*. The  $L_m$  is an essential tool for fisheries management and planning <sup>3</sup> (Lucifora et al., 1999; Hossain et al., 2012b, 2013, 2016). In the present study, the  $L_m$  was 5.02 cm (TL) for *M. lamarrei*. Whereas, Hussain and Manohar (2017) reported the  $L_m$  was 4.70 cm (TL) from the upper lake Bhopal, India which is lower than our results. However,  $L_m$  may vary due to population thickness, water temperature, perceived length and food availability (Hossain et al., 2012c).

Reproduction cycle and time of spawning <sup>3</sup> was estimated by several models including direct observation of spawning, brooding of eggs over time, <sup>3</sup> appearance of ovary and maturation stages over time (King, 2007), relative weight of gonad (TL vs. gonadosomatic index, modified gonadosomatic index and <sup>5</sup> dobrial index) over time (Hossain et al., 2017; Ahmed et al., 2018; Khatun et al., 2019; Sabbir et al., 2021) and histological studies (Chelemal et al., 2009; Hussain and Manohar, 2017; <sup>6</sup> Lucano-Ramirez et al., 2019). The spawning seasons of *M. lamarrei* was estimated by the percentage of mature females present in the catch or by changes in gonadal indices (Garcia, 1985; Erisman et al., 2012). However, <sup>35</sup> in the current study we observed that the ovigerous females of *M. lamarrei* <sup>25</sup> were found throughout the year except the month of December and January <sup>40</sup> which means the spawning season was February-November with the peak of June and July. Sharma and Subba (2005) reported that females of *M. lamarrei* were not having mature eggs in the month of December, January and February from Biratnagar, Nepal which is close agreement with our present study. Hussain and Manohar (2016, 2017) and Sarker et al.

(2012) reported that *M. lamarrei* was a continuous breeder from Bhopal and West Bengal in India respectively, which is also almost similar to our findings. Whereas, Bhuiyan et al. (2008) recorded spawning season was April-June from Rajshahi, Bangladesh and Paul (2001) reported May-August from Natore, Bangladesh which is dissimilar to our present study. Hussain and Manohar (2016, 2017) reported two peak seasons (May-June and November-December) in a year for *M. lamarrei* From Bhopal, India. However, this disparity may be occurring due to environmental factors, population densities, and food availability (Khatun et al., 2019; Sabbir et al., 2021).

Condition factor discloses several biological interfaces of aquatic organisms like maturity status and level of fitness (Hossen et al., 2019; Sabbir et al., 2020). In this study,  $K_F$  was found significantly related to POF. The study revealed that 50 % of ovigerous females were found when the  $K_F$  was 0.85 and 90% ovigerous females were found when  $K_F$  was 1.03. So, this condition is suitable for the spawning of *M. lamarrei*. Therefore, it is suggested that for aquaculture purposes this condition should be maintained in hatchery for artificial breeding of this species.

Fecundity is used for predicting how many of broods is requisite to producing preferred quantities of offspring (Sharma and Subba, 2005). In addition, it helps to estimate the smallest number of broods needed to sustain the recruitment and offspring survival rates. In the present study, the  $F_T$  of *M. lamarrei* varied from 65-370 ( $154 \pm 59$ ). Saifullah et al. (2005) documented the total fecundity ( $F_T$ ) ranged from 141-328 in the North East and North West regions, Bangladesh. Likewise, Shafi and Quddus (1982), Sharma and Subba (2005), Hussain and Manohar (2016) and recorded fecundity was ranged from 2250-16300, 82-308, and 69-143 in Biratnagar, Nepal, Bhopal, India and Bangladesh respectively. However, the numbers of eggs for many crustaceans' species are highly variable (Khmeleva and Golobev 1986). This variation occurs due to some factor i.e. age, length, weight and environmental condition (Sharma and Subba, 2005).

The success of crustaceans can be ascribed to the point that most of them bear their ovum till hatching and this is why offspring survival rate is high. The sizes of the mother control the number of ovum/egg carried by a female. In numerous crustaceans, the number of eggs has been observed to be linear to the size of the female (Vogt, 2012; Subramoniam, 2013). In

addition, in the current study we observed that the total fecundity ( $F_T$ ) has significant relationship with TL and BW which was supported by Saifullah et al. (2005). Whereas, Sharma and Subba (2005) observed insignificant relationship between total length and total fecundity which was dissimilar with our findings and significant relationship between body weight and total fecundity which was support our present findings.

The impact of environmental change on aquatic organisms will differ with habitat, latitude, water features, and in riverine schemes, current regimes (Pankhurst and Munday, 2011). The reproductive strategy of *M. lamarrei* was affected by the environmental conditions. In our study, the peak values of ovigerous females (%) followed from June-July and at the same time water temperature is also high which confirms that water temperature has an effect on prawn reproduction. During our study, the lowest temperature was found in January, and the highest was in April-June and there was substantial connection between temperature and ovigerous females. The spawning period was started when temperature is above than 25 °C. In this study, the highest ovigerous female (%) was observed in April -July when the average temperature was 32°C. In case of *Macrobrachium rosenbergii* suitable temperature for spawning was 25-29.5 °C under a laboratory condition in Egypt recorded by Hasbashy (2010). We found DO, pH and total alkalinity ranges around 5.52-6.10 mg/l, 7.13 ppt and 82.14-90.90 mg/l, respectively from peak spawning time of *M. lamarrei*. So, these ranges are supposed to be optimum for reproduction of *M. lamarrei*. There was no work on these types of aspect for *M. lamarrei* but Hasbashy (2010) research on these types of aspect for *M. rosenbergii* and found suitable ranges DO and pH was 6.00-6.80 mg/l and 7.5-8.4 ppt, respectively from Egypt (under a laboratory condition). The analysis of climate data (1964–2014) indicated temperature is increasing by 0.029 °C yr<sup>-1</sup> and rainfall is reducing by 2.96 mm yr<sup>-1</sup> in the northwestern district of Bangladesh which alarmingly forecast the shifting of the spawning season of this species.

Spawning events are normally related to climatic conditions (Wilding et al., 2000). In the current study, we observed a highly significant relationship between rainfall vs. ovigerous females (%). The uppermost rainfall was noted in the month of June (389 mm) and this is the peak spawning season of *M. lamarrei*. The lowest rainfall was observed in November–January when the ovigerous female (%) was also lowest. As it is the first work on this aspect, so comparison is not possible.

## 5. Conclusion

Our research <sup>31</sup> will be helpful to set the mesh size of nets based on  $L_m$  and establishment of ban period during peak spawning season which is essential for the existence/conservation of *M. lamarrei* year after year in the Ganges River and worldwide water bodies. As well, a long series data of climate change showed the ups and down of temperature and rainfall have significant impact on the reproduction of *M. lamarrei*. Therefore, it can be imagined that the spawning season might be shifting in the future which should be taken into consideration for successful management of *M. lamarrei* in the Ganges River as well as worldwide water bodies.

## Acknowledgements

We would like to thank Bangladesh fisheries research institute for their cordial support.

## References

- Ahamed, F., Saha, N., Ahmed, Z.F., Hossain, M.Y., Ohtomi, J., 2018. Reproductive biology of *Apocryptes bato* (Gobiidae) in the Payra River, southern Bangladesh. *J. Appl. Ichthyol.* 34, 1169–1175.
- Alam, A., Joshi, K.D., Das, S.C., 2016. Feeding and reproductive behaviour of the river catfish *Rita rita* (Hamilton, 1822) in the river Ganga, India. *Indian J. Anim. Sci.* 86(6), 736–740.
- Ara, M.G., Nobi, M.N., Ahmed, Z.F., Fatema, M.K., 2014. Length-weight relationship and growth pattern inference of a small indigenous freshwater prawn, *Macrobrachium lamarrei* (H. Milne-Edwards, 1837) in Bangladesh. *Res. Agri. Live. Fish.* 1, 137–145.
- Bertini, G., Fransozo, A., Negreiros-Fransozo, M.L., 2010. Brachyuran soft-bottom assemblage from marine shallow waters in the southeastern Brazilian littoral. *Mar Biodiv.* 4, 277–291.
- Bhuiyan, S.S., Joadder, M.A.R., Bhuiyan, A.S., 2008. Occurrence of fishes and non-fin fishes of the River Padma near Rajshahi, Bangladesh. *Univ. j. zool. Rajshahi Univ.* 27, 99–100.
- Blanck, A., Lamouroux, N., 2007. Large-scale in traspecific variation in life-history traits of European fresh water fish. *J. Biogeogr.* 34, 862–875.

- Britton, J.R., Davies, G.D., Pegg, J., 2013. Spatial variation in the somatic growth rates of European barbel *Barbus barbus*: a UK perspective. *Ecol. Freshw. Fish.* 22, 21–29.
- Cai, Y., Naiyaneter, P., 2004. The freshwater prawns of the genus *Macrobrachium* Bate, 1868, of Thailand (Crustacea: Decapoda: Palaemonidae). *J. Nature History* 38, 581–649.
- Carmona-Catot, G., Benito, J., García-Berthou, E., 2011. Comparing latitudinal and upstream downstream gradients: life history traits of invasive mosquito fish. *Divers. Distrib.* 17, 214–224.
- Chelemal, M., Jamili, S., Sharifpour, I., 2009. Reproductive biology and histological studies in Abu Mullet, *Liza abu* in the water of the Khozestan province. *J. Fish. Aquat. Sci.* 4, 1–11.
- De Grave, S., Fransen, C.H.J.M., 2011. Carideorum Catalogus: The recent species of the dendrobranchiate, stenopodidean, procarididean and caridean shrimps (Crustacea: Decapoda). *Zool. Med. Leiden.* 85, 195–589.
- Doll, P., Fiedler, K., Zhang, J., 2009. Global-scale analysis of river flow alterations due to water withdrawals and reservoirs. *Hydrol. Earth. Syst. Sci.* 13, 2413–2432.
- Erisman, B., Aburto-Oropeza, O., Gonzalez-Abraham, C., Mascareñas –Osorio, I., Moreno-Báez, M., Hastings-Spatiotemporal, P.A., 2012. Dynamics of a fish spawning aggregation and its fishery in the Gulf of California. *Sci. Rep.* 2, 284.
- Fulton, T.W., 1904. The rate of growth of fishes, 22<sup>nd</sup> annual report, Part III. Edinburg: Fisheries board of Scotland.
- Garcia, S., 1985. Reproduction, stock assessment models and population parameters in exploited penaeid shrimp populations. In: Rothlisberg, P. C., Hill, B. J., Staples, D. J. (Eds.). Second Australian Natl. prawn Seminar, NPS2, Cleveland, Australia, 139–158.
- Habashy, M.M., 2010. On the breeding behavior and reproduction of the freshwater prawn, *Macrobrachium rosenbergii* (Decapoda-Crustacea) under laboratory conditions. *African J. Biol. Sci.* 6 (2), 63–73.
- Hardie, S.A., White, R.W., Barmuta, L.A., 2007. Reproductive biology of the threatened golden *Galaxias galaxias* Auratus Johnston and the influence of Lake Hydrology. *J. Fish. Biol.* 71, 1820–1840.
- Hossain, M.Y., Arefin, M.S., Mohmud, M.S., Hossain, M.I., Jewel, M.A.S., Rahman, M.M., Ohtomi, J., 2013. Length-weight relationships, condition factor, gonadosomatic index-based size at first sexual maturity, spawning season and fecundity of *Aspidoparia morar*

- (Cyprinidae) in the Jamuna River (Brahmaputra River distributary), northern Bangladesh. *J. Appl. Ichthyol.* 29, 1166–1169.
- Hossain, M.Y., Hossen, M.A., Islam, M.S., Jasmine, S., Nower, F., Rahman, M.M., 2017. Reproductive biology of *Pethia ticto* (Cyprinidae) from the Gorai River (SW Bangladesh). *J. Appl. Ichthyol.* 33, 1007–1014.
- Hossain, M.Y., Jewel M.A.S., Nahar, L., Rahman, M.M., Naif, A., Ohtomi, J., 2012b. Gonadosomatic index-based size at first sexual maturity of the catfish *Eutropiichthys vacha* (Hamilton, 1822) in the Ganges River (NW Bangladesh). *J. Appl. Ichthyol.* 28, 601–605.
- Hossain, M.Y., Naser, S.M.A., Bahkali, A.H., Yahya, K., Hossen, M.A., Elgorban, A.M., Rahman, M.M., 2016. Life history traits of the flying barb *Esomus danricus* (Hamilton, 1822) (Cyprinidae) in the Ganges River, Northwestern Bangladesh. *Pakistan. J. Zool.* 48, 399–408.
- Hossain, M.Y., Ohtomi, J., 2008. Reproductive biology of the southern rough shrimp *Trachysalambria curvirostris* (penaeidae) in Kagoshima bay, southern Japan. *J. Crustacean Biol.* 28(4), 607–612.
- Hossain, M.Y., Ohtomi, J., Jaman, A., Saleha, J., Robert, L.V.J., 2012a. Life history traits of the monsoon river prawn *Macrobrachium malcolmsonii* (Milne-Edwards, 1844) (Palaemonidae) in the Ganges (Padma) River, northwestern Bangladesh. *J. Freshw. Ecol.* 27, 131–142.
- Hossain, M.Y., Rahman, M.M., Miranda, R., Leunda, P.M., Oscoz, J., Jewel, M.A.S., Ohtomi, J., 2012c. Size at first sexual maturity, fecundity, length–weight and length–length relationships of *Puntius sophore* (Cyprinidae) in Bangladeshi waters. *J. Appl. Ichthyol.* 28, 818–822.
- Hossen, M.A., Paul, A.K., Hossain, M.Y., Ohtomi, J., Sabbir, W., Rahman, O., Jasmin, J., Khan, M.N., Islam, M.A., Rahman, M.A., Khatun, D., Kamruzzaman, S.K., 2019. Estimation of biometric indices for Snakehead *Channa punctata* (Bloch, 1973) through multi-model inferences. *Jordan J. Biol. Sci.* 12, 197–202.
- Hussain, S., Manohar, S., 2016. Reproductive aspects of freshwater prawn *Macrobrachium lamarrei lamarrei* {H. M. Edwards 1837} in upper lake at Bhopal. *Int. J. Fish. Aquat. Stu.* 4(6), 208–211.

- Hussain, S., Manohar, S., 2017. Reproductive biology of *Macrobrachium lamarrei* (H. Milne-Edwards, 1837) from the upper Lake, Bhopal, India. J. Entomol. Zool. Stud. 5(2), 32–36.
- IUCN, 2020. IUCN red list of threatened species. Version 2020-1. IUCN red list of threatened species (Downloaded on 03 February 2020)
- IUCN Bangladesh, 2015. Red list of Bangladesh Volume 5: Freshwater Fishes. IUCN, International Union for Conservation of Nature, Bangladesh Country Office, Dhaka, Bangladesh, 360p
- Jakobsen, T., Fogarty, M.J., Mergrey, B.A., Moksness, E., 2009. Fish reproductive biology, John Wiley & Sons, Chichester, United Kingdom
- Jasmine, S., Molina, M.A., 2016. Reproductive biology of *Mystus vittatus* (Bloch, 1794) in the Padma River, Bangladesh. Int. J. Fish. Aquat. Stud. 4(5), 666–669.
- Kanaujia, D.R., Mohanty, A.N., Tripathi, S.D., 1997. Growth and production of Indian river prawn *Macrobrachium malcolmsonii* (H. Milne Edwards) under pond conditions. Aquaculture 154, 79–85.
- Khan, M.F., Panikkar, P., Das, A.K., Manna, R.K., Singh, D.N., 2009. Population dynamics of monsoon river prawn *Macrobrachium malcolmsonii* (Milne Edwards) in Wyra, a tropical reservoir in India. Asian. Fish. Sci. 22, 1201–1210.
- Khatun, D., Hossain, M.Y., Nawer, F., Mostafa, A.A., Al-Askar, A.A., 2019. Reproduction of *Eutropiichthys vacha* (Schilbeidae) in the Ganges River (NW Bangladesh) with special reference to potential influence of climate variability. Environ. Sci. Pollut. Res. 26, 10800–10815.
- Khmeleva, N.N., Golobev, A.D., 1986. La Production Chez Les Crustaces role dans les ecosystem et utilization. Infremer. 198 p
- Kibria, G., 1983. Bangladesher Chingri sampad O Chingri Chas (Shrimp fishery and shrimp culture). Jahan Printing Press, Satkhira, Khulna. 126 p
- King, M., 2007. Fisheries biology, assessment and management, 2nd edn. Wiley-Blackwell Publishing, Oxford
- Lagler, K.F., 1956. Enumeration of fish eggs. In freshwater fishery biology. 2nd Edn. W.M. Brown company publishers. Dubuque, 106–110 pp
- Lagler, K.F., Bardach, J.E., Miller, R.R., 1967. Ichthyology. John. Willey & Some, Inc. New York, London, Sydney. 271–274 pp

- Lappalainen, J., Tarkan, A.S., Harrod, C., 2008. A meta-analysis of latitudinal variations in life-history traits of roach, *Rutilus rutilus*, over its geographical range: linear or non-linear relationships? *Freshwater Biol.* 53, 1491–1501.
- Ling, S.W., 1969. The general biology and development of *Macrobrachium rosenbergii*. FAO Fisheries Report 3, 589–606.
- Lorenzo, T.D., Galassi, D.M.P., 2017. Effect of Temperature Rising on the Stygobitic Crustacean Species *Diacyclops belgicus*: Does Global Warming Affect Groundwater Populations? *Water.* 9, 951.
- Lucano-Ramírez, G., Gómez-García, M.D.J., Ruiz-Ramírez, S., González-Sansón, G., Aguilar, Betancourt, C., Flores-Ortega, J.R., 2019. Reproductive characteristics of the sole *Achirus mazatlanus* (Pleuronectiformes: Achiridae) in the Barra de Navidad coastal lagoon, Jalisco, Mexico, *Ciencias Marinas* 45, 47–58.
- Lucifora, L.O., Valero, J.L., Garcia, V.B., 1999. Length at maturity of the green-eye spurdog shark, *Squalus mitsukuii* (Elasmobranchii: Squalidae) from the SW Atlantic, with comparisons with other regions. *Mar. Freshw. Res.* 50, 629–632.
- Mantelatto, F.L.M., Barbosa, L.R., 2005. Population structure and relative growth of freshwater prawn *Macrobrachium brasiliense* (Decapoda, Palaemonidae) from São Paulo State, Brazil. *Acta. Limnol. Bras.* 17, 245–255.
- Mossolin, E.C., Bueno, S.L.S., 2002. Reproductive biology of *Macrobrachium olfersi* (Decapoda, palaemonidae) in Sao Sebastião, Brazil. *J. Crust. Biol.* 22(2), 367–376.
- Mukheerjee, R., Kanaujia, D.R., Pandey, A.K., 2015. Breeding, larval biology, seed production and aquaculture of Indian river prawn, *Macrobrachium malcolmsonii* (H. Milne Edwards). *Biochem. Cell. Arch.* 15, 349–382.
- Nazari, E.M., Simoes-Costa, M.S., Muller, Y.M.R., Ammar, D., Dias, M., 2003. Comparisons of fecundity, egg size, and egg mass volume of the freshwater prawns *Macrobrachium potiuna* and *Macrobrachium olfersi* (Decapoda, Palaemonidae). *J. Crust. Boil.* 23(4), 862–868.
- Pankhurst, N.W., Munday, P.L., 2011. Effects of climate change on fish reproduction and early life history stages. *Mar. Freshw. Res.* 62, 1015–1026.
- Pankhurst, N.W., Porter, M.J.R., 2003. Cold and dark or warm and light: variations on the theme of environmental control of reproduction. *Fish. Physiol. Biochem.* 28, 385–389.



- Paschoal, L.R.P., de Oliveira, L.J.F., Andrioli, G.C., Zara, F.J., 2019. Reproductive biology of *Macrobrachium amazonicum* (Heller, 1862) populations with distinct phenotypes in Neotropical reservoirs during the 'El Niño' event. Mar. Freshwater. Res. <https://doi.org/10.1071/MF18228>
- Paul, S.K., 2001. Shrimp and lobster: Biology, in Bengali, Pub. Monika Paul, Gurudaspur, Natore, Bangladesh. pp. 58–59.
- Prasad, S., Kanaujia, D.R., 2006. Availability and Breeding Behaviour of Ganga River Prawn *Macrobrachium gangeticum* (Bate) and *Macrobrachium malcolmsonii* (H.M. Edwards). Asian. Fish. Sci. 19, 377–388.
- Praveen, A., Sarkar, U.K., Nagpure, N.S., Mishra, R.M., Kumar, R., Awasthi, A., Pandey, B.K., 2017. Dynamics of reproductive ecology of the fish *Ompok bimaculatus* (Siluriformes: Siluridae) in six tropical rivers of the Ganges basin, India. 9, 73–85.
- Purohit, B., Vachhrajani, K.D., 2018. First record of freshwater shrimp, *Macrobrachium lamarrei lamarrei* (H. Milne Edwards, 1837) from Gujarat, India. J. Fish. 6 (3), 654–657.
- Raghunathan, M.B., Valarmathi, K., 2005. Check list of freshwater prawns (Crustacea, Decapoda, Natantia) in Tamil Nadu India. Hydrobiol. 8(1), 35–39.
- Rajyalashmi, T., 1980. Comparative study of biology of fresh water prawn, *Macrobrachium malcolmsonii* Godavari and Hooghly River system. Indian Natn. Sci. Acad. 45, 72–89.
- Ramirez-Llodra, E., 2002. Fecundity and life-history strategies in marine invertebrates. Advances in marine biology. 43, 87–170.
- Rao, K.J., 1991. Reproductive biology of the giant freshwater prawn *Macrobrachium rosenbergii* (de Man) from Lake Kolleru (Andhra Pradesh). Indian J. Anim. Sci. 61, 780–787.
- Rashid, M.A., Shahjahan, R.M., Begum, R.A., Alam, M.S., Ferdous, Z., Kamruzzaman, M., 2013. Fecundity and Embryonic Development in Three *Macrobrachium* Species. J. Entomol. 1, 72–83.
- Sabbir, W., Hossain, M.Y., Rahman, M.A., Hasan, M.R., Mawa, Z., Tanjin, S., Hassan, H.U., Ohtomi, J., 2020. First report on condition factor of *Panna heterolepis* (Trewavas, 1977) in the Bay of Bengal (Southwestern Bangladesh) in relation to eco-climatic factors. Egypt J. Aquat. Biol. Fish. 24 (2), 591–608.

- Sabbir, W., Hossain, M.Y., Rahman, M.A., Hasan, M.R., Mawa, Z., Tanjin, S., Ohtomi, J., 2021. First report on reproductive features of the Hooghly croaker *Panna heterolepis* Trewavas, 1977 from the Bay of Bengal in relation to environmental factors. Environ. Sci. Pollut. R. 1, 1–8.
- Saifullah, A.S.M., Rahman, M.S., Jabber, S.M.A., Khan, Y.S.A., Uddin, N., 2005. Study on some aspects of biology of prawns from northeast and northwest regions of Bangladesh. Pak. J. Biol. Sci. 8(3), 425–428.
- Sarkar, I., Basu, A., Dutta, S., Roy, S., 2012. Male mating tactics and mating activity in freshwater prawn, *Macrobrachium dayanum* (Henderson, 1893) Palaemonidae: Caridae. Int. J. Aquat. Sci. 3(2), 56–70.
- Shafi, M., Quddus, M.M.A., 1982. Bangladesher matshya sampad (Fishery resources of Bangladesh). Bangla academy, Dhaka, pp: 44
- Shakuntala, K., 1977. The Relation between Body Size and Number of Eggs in the Freshwater Prawn, *Macrobrachium lamarrei* (H. Milne Edwards) (Decapoda, Caridea). Crustaceana 33, 17–22.
- Sharma, A., Subba, B.R., 2005. General biology of freshwater prawn, *Macrobrachium lamarrei* (Milne-Edwards, 1837) of Biratnagar, Nepal. Our Nature 3, 31–41.
- Shoji, J., Toshito, S., Mizuno, K., Kamimura, Y., Hori, H.K., 2011. Possible effects of global warming on fish recruitment: shifts in spawning season and latitudinal distribution can alter growth of fish early life stages through changes in day length. ICES. J. Mar. Sci. 68, 1165–1169.
- Soomro, A.N., Baloch, W.A., Chandio, T.J., Mohammad, A.W., Saddozai, S., 2012. Condition factor and length-weight relationship of monsoon river prawn *Macrobrachium malcolmsonii malcolmsonii* (H. Milne-Edwards, 1844) (Palaemonidae) in Lower Indus River. Pakistan J. Zool. 44(5), 1279–1283.
- Subramoniam, T., 2013. Origin and occurrence of sexual and mating systems in Crustacea: A progression towards communal living and eusociality. J. Biosci. 38, 951–969.
- Templeman, W., 1987. Differences in sexual maturity and related characteristics between populations of thorny skate (*Raja radiata*) from the northwest Atlantic. J. NW. Atl. Fish. Sci. 7, 155–167.

- Tiwari, K.K., 1955. Trend of evolution in the Hendersoni group of species of palaemon Fabricius. (Crustacea: Decapoda), Bulletin of the National Institute of science of India, New Delhi. 7, 189–197.
- Tracey, S.R., Lyle, J., Haddon, M., 2007. Reproductive biology and per-recruit analyses of striped trumpeter (*Latris lineata*) from Tasmania, Australia: Implications for management. Fish. Res. 84, 358–368.
- Vogt, G., 2012. Abbreviation of larval development and extension of brood care as key features of the evolution of freshwater Decapoda. Biological reviews of the Cambridge Philosophical Society.
- Wynne, F., 2000. Grow-out culture of freshwater prawns in Kentucky. Archived from the original on 21 August 2008. Retrieved 4 July 2005.
- Wilding, T., Young, K., Pitkethley, R., 2000. Bay of plenty freshwater fish calendar. In: Environmental report 00/26. Environment Bay of plenty, Whakatane.

25%

SIMILARITY INDEX

13%

INTERNET SOURCES

21%

PUBLICATIONS

%

STUDENT PAPERS

---

## PRIMARY SOURCES

---

- 1** Dalia Khatun, Md. Yeamin Hossain, Fairuz Nawer, Ashraf A. Mostafa, Abdulaziz A. Al-Askar. "Reproduction of Eutropiichthys vacha (Schilbeidae) in the Ganges River (NW Bangladesh) with special reference to potential influence of climate variability", Environmental Science and Pollution Research, 2019  
Publication 4%

---
- 2** Wasim Sabbir, Md. Yeamin Hossain, Md. Ashekur Rahman, Md. Rabiul Hasan, Zannatul Mawa, Sumaya Tanjin, Nasiruddin, Jun Ohtomi. "First report on reproductive features of the Hooghly croaker Panna heterolepis Trewavas, 1977 from the Bay of Bengal in relation to environmental factors", Environmental Science and Pollution Research, 2021  
Publication 2%

---
- 3** Md. Rabiul Hasan, Md. Yeamin Hossain, Zannatul Mawa, Sumaya Tanjin, Md. Ashekur Rahman, Uttam Kumar Sarkar, Jun Ohtomi. 2%

"Evaluating the size at sexual maturity for 20 fish species (Actinopterygii) in wetland (Gajner Beel) ecosystem, north-western Bangladesh through multi-model approach: A key for sound management", Acta Ichthyologica et Piscatoria, 2021

Publication

4

[nopr.niscair.res.in](http://nopr.niscair.res.in)

Internet Source

2%

5

Zannatul Mawa, Md. Yeamin Hossain, Md. Rabiul Hasan, Sumaya Tanjin, Md. Ashekur Rahman, Most. Shakila Sarmin, Kazi Ahsan Habib. "First record on size at sexual maturity and optimum catchable length of 10 marine fishes from the Bay of Bengal (Bangladesh) through multi-models approach: a key for sound fisheries management", Environmental Science and Pollution Research, 2021

Publication

1%

6

[www.entomoljournal.com](http://www.entomoljournal.com)

Internet Source

1%

7

[en.wikipedia.org](http://en.wikipedia.org)

Internet Source

1%

8

[www.fisheriesjournal.com](http://www.fisheriesjournal.com)

Internet Source

1%

9

Rachel Leproult, Egidio F. Colecchia, Anna Maria Berardi, Robert Stickgold, Stephen M.

1%

Kosslyn, Eve Van Cauter. "Individual differences in subjective and objective alertness during sleep deprivation are stable and unrelated", *American Journal of Physiology-Regulatory, Integrative and Comparative Physiology*, 2003

Publication

10

[jjbs.hu.edu.jo](http://jjbs.hu.edu.jo)

Internet Source

1 %

11

Ronaldo O. Cavallo. "Reproductive Performance of *Macrobrachium rosenbergii* Females in Captivity", *Journal of the World Aquaculture Society*, 3/2001

Publication

1 %

12

[journalarticle.ukm.my](http://journalarticle.ukm.my)

Internet Source

1 %

13

Md. Yeamin Hossain, Jun Ohtomi, Ahmed Jaman, Saleha Jasmine, Robert L. Vadas. " Life history traits of the Monsoon River prawn (*Milne-Edwards*, 1844) (*Palaemonidae*) in the Ganges (Padma) River, northwestern Bangladesh ", *Journal of Freshwater Ecology*, 2011

Publication

1 %

14

MM Rahman, MI Miah. "Fecundity of guchibaim, *Mastacembelus pancalus*", *Journal of the Bangladesh Agricultural University*, 1970

<1 %

15

[www.fish4thefuture.com](http://www.fish4thefuture.com)

Internet Source

<1 %

---

16

Mario Martínez-Mayén, Ramiro Román-Contreras. "Sexual maturity, fecundity, and embryo loss in the pontoniine shrimp *Cuapetes americanus* (Kingsley, 1878) (Decapoda: Palaemonidae) in Bahía de la Ascensión, Quintana Roo, Mexico", *Journal of Crustacean Biology*, 2014

Publication

<1 %

---

17

P. Döll, J. Zhang. "Impact of climate change on freshwater ecosystems: a global-scale analysis of ecologically relevant river flow alterations", Copernicus GmbH, 2010

Publication

<1 %

---

18

[onlinelibrary.wiley.com](http://onlinelibrary.wiley.com)

Internet Source

<1 %

---

19

[www.kmae-journal.org](http://www.kmae-journal.org)

Internet Source

<1 %

---

20

Ferdous Ahamed, Newton Saha, Zoarder F. Ahmed, Md. Yeamin Hossain, Jun Ohtomi. "Reproductive biology of (Gobiidae) in the Payra River, southern Bangladesh ", *Journal of Applied Ichthyology*, 2018

Publication

<1 %

---

21

Internet Source

&lt;1 %

22

M. Y. Hossain, M. Mosaddequr Rahman, R. Miranda, P. M. Leunda, J. Oscoz, M. A. S. Jewel, A. Naif, J. Ohtomi. " Size at first sexual maturity, fecundity, length-weight and length-length relationships of (Cyprinidae) in Bangladeshi waters ", Journal of Applied Ichthyology, 2012

Publication

&lt;1 %

23

[journal.bdfish.org](http://journal.bdfish.org)

Internet Source

&lt;1 %

24

[www.publish.csiro.au](http://www.publish.csiro.au)

Internet Source

&lt;1 %

25

ASM Musa, Abdus Salam Bhuiyan. "Determination of sexual dimorphism in *Mystus bleekeri* (Day)", University Journal of Zoology, Rajshahi University, 1970

Publication

&lt;1 %

26

[hal.archives-ouvertes.fr](http://hal.archives-ouvertes.fr)

Internet Source

&lt;1 %

27

[www.jclmm.com](http://www.jclmm.com)

Internet Source

&lt;1 %

28

"A Global Overview of the Conservation of Freshwater Decapod Crustaceans", Springer Science and Business Media LLC, 2016

Publication

&lt;1 %



---

29

"Morphological research on *Botia lohachata*",  
*Journal of Coastal Life Medicine*, 2016

Publication

<1 %

---

30

Lawren Sack, Kristen Frole. "LEAF  
STRUCTURAL DIVERSITY IS RELATED TO  
HYDRAULIC CAPACITY IN TROPICAL RAIN  
FOREST TREES", *Ecology*, 2006

Publication

<1 %

---

31

Mehedi Hasan, Md. Hafiz All Hosen, Md. Idris  
Miah, Zoarder Faruque Ahmed, Mousumi  
Sarker Chhanda, Sheik Istiak Md. Shahriar.  
"Fecundity, length at maturity and gonadal  
development indices of river catfish  
(*Clupisoma garua*) of the old Brahmaputra  
River in Bangladesh", *The Egyptian Journal of  
Aquatic Research*, 2020

Publication

<1 %

---

32

Warut Siriwut, Ekgachai Jeratthitikul, Somsak  
Panha, Ratmanee Chanabun, Chirasak  
Sutcharit. " Molecular phylogeny and species  
delimitation of the freshwater prawn species  
group, with descriptions of three new species  
from Thailand ", *PeerJ*, 2020

Publication

<1 %

---

33

[digitalcommons.fiu.edu](https://digitalcommons.fiu.edu)

Internet Source

<1 %

---

34

[portals.iucn.org](https://portals.iucn.org)

Internet Source

<1 %

35

CAIO A.M. PAVANELLI, EMERSON C. MOSSOLIN, FERNANDO L. MANTELATTO. "Reproductive strategy of the snapping shrimp *H. Milne-Edwards*, 1837 in the South Atlantic: fecundity, egg features, and reproductive output ", *Invertebrate Reproduction & Development*, 2008

Publication

<1 %

36

Jô de Farias LIMA, Mayara Cristina Moura DA CRUZ, Luis Mauricio Abdon da SILVA.

"Reproductive biology of *Macrobrachium surinamicum* (Decapoda: Palaemonidae) in the Amazon River mouth", *Acta Amazonica*, 2015

Publication

<1 %

37

Tanimoto, M., J. B. Robins, M. F. O'Neill, I. A. Halliday, and A. B. Campbell. "Quantifying the effects of climate change and water abstraction on a population of barramundi (*Lates calcarifer*), a diadromous estuarine finfish", *Marine and Freshwater Research*, 2012.

Publication

<1 %

38

[banglajol.info](http://banglajol.info)

Internet Source

<1 %

39 eprints.cmfri.org.in <1 %  
Internet Source

---

40 essence-journal.com <1 %  
Internet Source

---

41 ijnss.org <1 %  
Internet Source

---

42 linknovate.com <1 %  
Internet Source

---

43 www.scielo.sa.cr <1 %  
Internet Source

---

Exclude quotes On

Exclude matches Off

Exclude bibliography On
